# Supplementary material for: Joint Action of Trichoderma atroviride and a Vegetal Derived-Protein Hydrolysate Improves Yield, Fruit Quality and Economic Profitability of Two Woodland Strawberry Cultivars Grown Under Greenhouse
Source: Preprints.org preprint supplement (doi:10.20944/preprints202403.1070.v1), 2024-03-19
Supplement: Supplementary file 1 [file supplementary]

**Table S1.** Composition and aminogram of Tyson® protein hydrolysate.

| **Composition** | |
| --- | --- |
| Total nitrogen | 5.00% |
| Organic nitrogen | 4.50% |
| Organic carbon | 25.00% |
| Free amino acids | 13.40% |
| **Amino acids** | **% W/W** |
| Alanine | 0.83 |
| Arginine | 0.11 |
| Aspartic acid | 0.72 |
| Glutamic acid | 7 |
| Glycine | 0.05 |
| Lysine | 0.05 |
| Methionine | 0.05 |
| Phenylalanine | 0.05 |
| Proline | 3.21 |
| Tryptophan | 1.25 |
| Valine | 0.05 |

**Table S2.** Significance of the ANOVA for all recorded parameters.

| **Parameters** | **Genotype (G)** | **Biostimulant (B)** | **Year (Y)** | **G × B** | **G × Y** | **B × Y** | **G × B × Y** |
| --- | --- | --- | --- | --- | --- | --- | --- |
| Marketable yield | ******* | *** | NS | NS | NS | NS | NS |
| Mean fruit weight | * | *** | NS | NS | NS | NS | NS |
| Fruit dry matter | ** | *** | NS | NS | NS | NS | NS |
| Fruit firmness | * | *** | NS | NS | NS | NS | NS |
| TSS | *** | *** | NS | NS | NS | NS | NS |
| Total sugars | *** | *** | NS | NS | NS | NS | NS |
| Ascorbic acid | *** | *** | NS | NS | NS | NS | NS |
| Flavonoids | ** | *** | NS | NS | NS | NS | NS |
| Anthocyanins | *** | *** | NS | NS | NS | NS | NS |
| Total polyphenols | *** | *** | NS | *** | NS | NS | NS |
| Antioxidant activity | *** | *** | NS | * | NS | NS | NS |

NS: not significant, * significant at p ≤ 0.05, ** significant at p ≤ 0.01, *** significant at p ≤ 0.001
